# Supplementary material for: Tunable ultra-broadband full-visible-spectral emission of Bi3+-doped aluminate phosphors enabled by structure transformation and site occupancy engineering
Source: Royal Society of Chemistry journal article supplement (doi:10.1039/d3tc02171h), 2023-01-01
Supplement: d3tc02171h1.pdf [file d3tc02171h1.pdf]

Supporting Information

**Tunable ultra-broadband full-visible-spectral emission of Bi<sup>3+</sup>  
doped aluminate phosphors enabled by structure transformation  
and site occupancy engineering**

Qingfeng Bian, Ge Zhu\*, Zhuowei Li, Shanshan Li, Wen Xu, Yan Cong, Ming He,  
Shuangyu Xin, Bin Dong\*

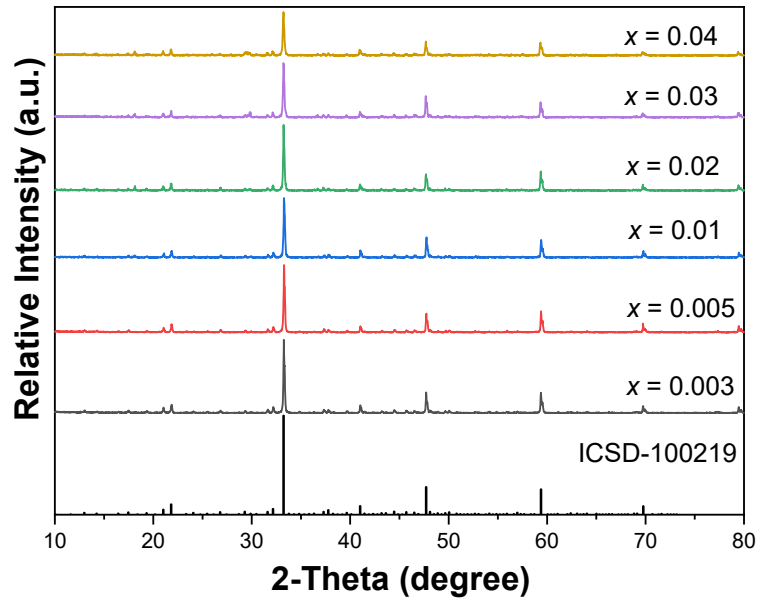

Figure S1 XRD patterns for  $\text{Na}_{0.625}\text{Ca}_{8.688-x}\text{Al}_6\text{O}_{18}:x\text{Bi}^{3+}$  ( $0.003 \leq x \leq 0.04$ ) with different  $\text{Bi}^{3+}$  doing. contents

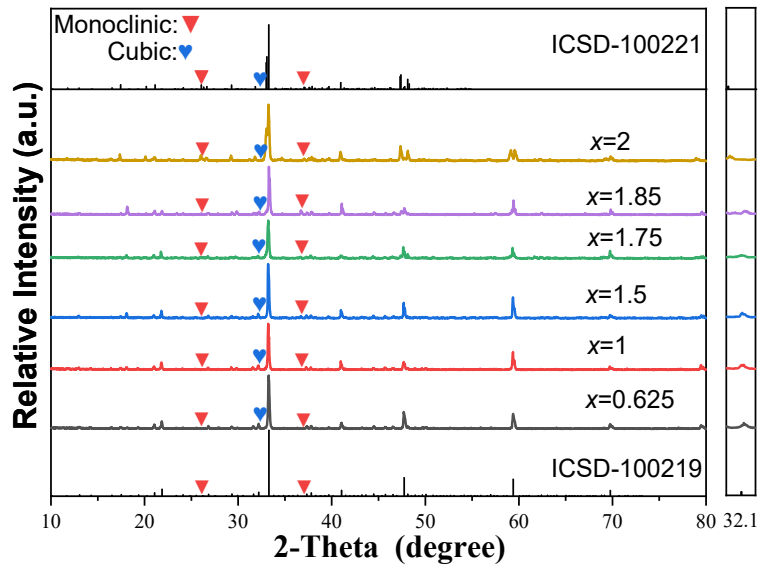

Figure S2 XRD patterns for  $\text{Na}_y\text{Ca}_{8.98-y/2}\text{Al}_6\text{O}_{18}:0.02\text{Bi}^{3+}$  ( $0.625 \leq y \leq 2$ ).

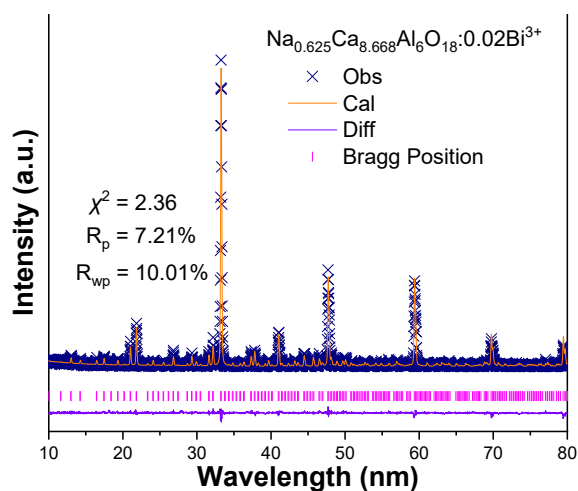

Figure S3 X-ray diffraction Rietveld refinement of the  $\text{Na}_{0.625}\text{Ca}_{8.668}\text{Al}_6\text{O}_{18}:\text{0.02Bi}^{3+}$

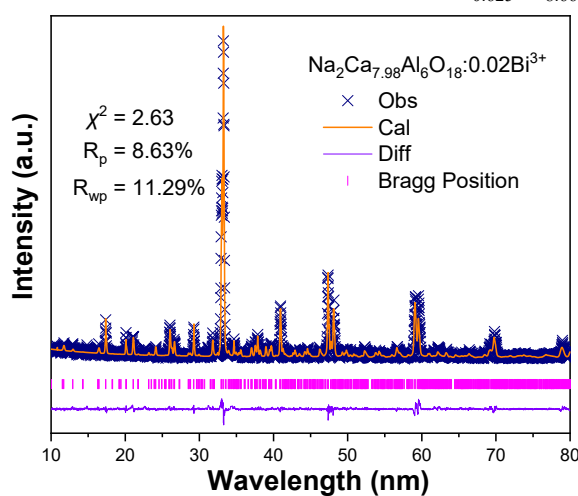

Figure S4 X-ray diffraction Rietveld refinement of the  $\text{Na}_2\text{Ca}_{7.98}\text{Al}_6\text{O}_{18}:\text{0.02Bi}^{3+}$

Table S1 The crystallographic parameters of  $\text{Na}_{0.625}\text{Ca}_{8.668}\text{Al}_6\text{O}_{18}:\text{0.02Bi}^{3+}$

| $\text{Na}_{0.625}\text{Ca}_{8.668}\text{Al}_6\text{O}_{18}:\text{0.02Bi}^{3+}$ |                                                              |
|---------------------------------------------------------------------------------|--------------------------------------------------------------|
| Crystal system                                                                  | Cubic                                                        |
| Space group                                                                     | $P2_13$                                                      |
| Lattice parameters                                                              | $a=b=c=15.236 \text{ \AA}$<br>$\alpha=\beta=\gamma=90^\circ$ |
| Unit cell volume                                                                | $V=3536.82 \text{ \AA}^3$                                    |
| $\chi^2$                                                                        | 2.36                                                         |
| $R_p$                                                                           | 7.21 %                                                       |
| $R_{wp}$                                                                        | 10.01 %                                                      |

Table S2 The crystallographic parameters of  $\text{Na}_2\text{Ca}_{7.98}\text{Al}_6\text{O}_{18}:0.02\text{Bi}^{3+}$ 

| <b><math>\text{Na}_2\text{Ca}_{7.98}\text{Al}_6\text{O}_{18}:0.02\text{Bi}^{3+}</math></b> |                                |
|--------------------------------------------------------------------------------------------|--------------------------------|
| Crystal system                                                                             | Monoclinic                     |
| Space group                                                                                | $P2_1/c$                       |
| Lattice parameters                                                                         | a=10.874 Å                     |
|                                                                                            | b=10.849 Å                     |
|                                                                                            | c=15.130 Å                     |
|                                                                                            | $\alpha=\beta=\gamma=90^\circ$ |
| Unit cell volume                                                                           | V=1784.92 Å <sup>3</sup>       |
| $\chi^2$                                                                                   | 2.63                           |
| R <sub>p</sub>                                                                             | 8.63 %                         |
| R <sub>wp</sub>                                                                            | 11.29 %                        |

Table S3 The lattice, site occupation and isotropic displacement parameters of

| $\text{Na}_{0.625}\text{Ca}_{8.668}\text{Al}_6\text{O}_{18}:0.02\text{Bi}^{3+}$ |        |          |          |          |        |
|---------------------------------------------------------------------------------|--------|----------|----------|----------|--------|
| Atom                                                                            | Occup. | <i>x</i> | <i>y</i> | <i>z</i> | Uiso   |
| Ca1                                                                             | 0.9982 | 0        | 0        | 0        | 0.0015 |
| Ca2                                                                             | 0.9979 | 0.5018   | 0.5018   | 0.5018   | 0.0021 |
| Ca3                                                                             | 0.9080 | 0.2630   | 0.2630   | 0.2630   | 0.0041 |
| Na1                                                                             | 0.090  | 0.2630   | 0.2630   | 0.2630   | 0.0044 |
| Ca4                                                                             | 0.729  | -0.2562  | -0.2562  | -0.2562  | 0.0072 |
| Na2                                                                             | 0.270  | -0.2562  | -0.2562  | -0.2562  | 0.0081 |
| Ca5                                                                             | 0.966  | 0.3814   | 0.3814   | 0.3814   | 0.0041 |
| Na3                                                                             | 0.030  | 0.3814   | 0.3814   | 0.3814   | 0.0157 |
| Ca6                                                                             | 0.759  | -0.3763  | -0.3763  | -0.3763  | 0.0041 |
| Na4                                                                             | 0.240  | -0.3763  | -0.3763  | -0.3763  | 0.0012 |
| Ca7                                                                             | 0.498  | 0.3720   | 0.1400   | 0.1361   | 0.0344 |
| Ca8                                                                             | 0.499  | 0.3678   | 0.1262   | 0.1345   | 0.0421 |
| Ca9                                                                             | 0.497  | 0.6232   | 0.1376   | 0.1180   | 0.0013 |
| Ca10                                                                            | 0.499  | 0.6431   | 0.1363   | 0.1287   | 0.0016 |
| Ca11                                                                            | 0.998  | 0.3824   | 0.3863   | 0.1213   | 0.0032 |
| Ca12                                                                            | 0.997  | -0.3800  | -0.3881  | -0.1201  | 0.0057 |
| Na5                                                                             | 0.310  | 0.1210   | 0.1210   | 0.1210   | 0.0247 |
| Na6                                                                             | 0.310  | 0.8750   | 0.8750   | 0.8750   | 0.0024 |
| Al1                                                                             | 1.000  | 0.2539   | 0.0134   | 0.0167   | 0.0058 |
| Al2                                                                             | 1.000  | -0.2534  | -0.0129  | -0.0232  | 0.0048 |
| Al3                                                                             | 1.000  | 0.2434   | 0.2371   | 0.0053   | 0.0068 |
| Al4                                                                             | 1.000  | -0.2445  | -0.2377  | -0.0063  | 0.0055 |
| O1                                                                              | 1.000  | 0.2630   | 0.1264   | 0.0029   | 0.0236 |
| O2                                                                              | 1.000  | -0.2658  | -0.1258  | -0.0230  | 0.0369 |

|      |       |         |         |         |        |
|------|-------|---------|---------|---------|--------|
| O3   | 1.000 | 0.4759  | 0.1327  | 0.2475  | 0.0113 |
| O4   | 1.000 | -0.4952 | -0.1310 | -0.2368 | 0.0195 |
| O5   | 1.000 | 0.2729  | 0.2765  | 0.1082  | 0.0175 |
| O6   | 1.000 | -0.2629 | -0.2906 | -0.1058 | 0.0187 |
| O7   | 1.000 | 0.2406  | 0.4114  | 0.3040  | 0.0160 |
| O8   | 1.000 | -0.2281 | -0.4062 | -0.2878 | 0.0156 |
| O9   | 1.000 | 0.3502  | -0.0321 | -0.0274 | 0.0138 |
| O10  | 1.000 | -0.3505 | 0.0233  | 0.0234  | 0.0199 |
| O11  | 1.000 | 0.1497  | -0.0173 | -0.0171 | 0.0129 |
| O12  | 1.000 | -0.1515 | 0.0150  | 0.0163  | 0.0075 |
| Bi1  | 0.002 | 0       | 0       | 0       | 0.0009 |
| Bi2  | 0.002 | 0.5018  | 0.5018  | 0.5018  | 0.0011 |
| Bi3  | 0.002 | 0.2630  | 0.2630  | 0.2630  | 0.0031 |
| Bi4  | 0.001 | -0.2562 | -0.2562 | -0.2562 | 0.0023 |
| Bi5  | 0.001 | 0.3814  | 0.3814  | 0.3814  | 0.0025 |
| Bi6  | 0.001 | -0.3763 | -0.3763 | -0.3763 | 0.0032 |
| Bi7  | 0.002 | 0.3720  | 0.1400  | 0.1361  | 0.0021 |
| Bi8  | 0.001 | 0.3678  | 0.1262  | 0.1345  | 0.0056 |
| Bi9  | 0.003 | 0.6232  | 0.1376  | 0.1180  | 0.0042 |
| Bi10 | 0.001 | 0.6431  | 0.1363  | 0.1287  | 0.0032 |
| Bi11 | 0.001 | 0.3824  | 0.3863  | 0.1213  | 0.0198 |
| Bi12 | 0.003 | -0.3800 | -0.3881 | -0.1201 | 0.0421 |

Table S4 The cation-oxygen bond lengths in the  $\text{Na}_{0.625}\text{Ca}_{8.668}\text{Al}_6\text{O}_{18}:0.02\text{Bi}^{3+}$

|                             | Atom        | Average  |               | Atom            | Average  |               |
|-----------------------------|-------------|----------|---------------|-----------------|----------|---------------|
| <b>Six-coordination</b>     | <b>Ca1</b>  |          |               | <b>Ca4/ Na2</b> |          |               |
|                             | O11         | 2.3121×3 | <b>2.3232</b> | O6              | 2.3543×3 | <b>2.3651</b> |
|                             | O12         | 2.3342×3 |               | O8              | 2.3759×3 |               |
|                             | <b>Ca2</b>  |          | <b>2.3543</b> |                 |          |               |
|                             | O9          | 2.3474×3 |               |                 |          |               |
|                             | O10         | 2.3612×3 |               |                 |          |               |
| <b>Total average:2.3511</b> |             |          |               |                 |          |               |
| <b>Seven-coordination</b>   | <b>Ca11</b> |          |               | <b>Ca12</b>     |          |               |
|                             | O7          | 2.2542   | <b>2.5129</b> | O8              | 2.2822   | <b>2.5110</b> |
|                             | O11         | 2.2752   |               | O12             | 2.3304   |               |
|                             | O5          | 2.3692   |               | O6              | 2.3332   |               |
|                             | O3          | 2.4712   |               | O11             | 2.5820×2 |               |
|                             | O12         | 2.5929×2 |               | O4              | 2.7312   |               |
|                             | O2          | 3.0349   | O1            | 2.7962          |          |               |
| <b>Total average:2.5110</b> |             |          |               |                 |          |               |
| <b>Eight-coordination</b>   | <b>Ca7</b>  |          |               | <b>Ca9</b>      |          |               |
|                             | O9          | 2.2109   | <b>2.6396</b> | O10             | 2.2972   | <b>2.6450</b> |
|                             | O3          | 2.325    |               | O4              | 2.2977   |               |
|                             | O5          | 2.5892   |               | O6              | 2.3793   |               |
|                             |             |          |               |                 |          |               |

|                          |                |          |                |                             |          |               |
|--------------------------|----------------|----------|----------------|-----------------------------|----------|---------------|
|                          | O5             | 2.6065   |                | O2                          | 2.4884   |               |
|                          | O1             | 2.6321   |                | O9                          | 2.6497   |               |
|                          | O4             | 2.7623   |                | O8                          | 2.8873   |               |
|                          | O10            | 2.9656   |                | O3                          | 2.991    |               |
|                          | O7             | 3.0249   |                | O6                          | 3.1693   |               |
|                          | <b>Ca8</b>     |          |                | <b>Ca10</b>                 |          |               |
|                          | O9             | 2.2625   |                | O10                         | 2.3567   |               |
|                          | O3             | 2.3861   |                | O6                          | 2.3584   |               |
|                          | O5             | 2.5425   |                | O2                          | 2.3748   |               |
|                          | O4             | 2.5562   | <b>2.6384</b>  | O4                          | 2.4391   | <b>2.6433</b> |
|                          | O1             | 2.5647   |                | O8                          | 2.6661   |               |
|                          | O5             | 2.7394   |                | O6                          | 2.8291   |               |
|                          | O10            | 2.8302   |                | O9                          | 2.9946   |               |
|                          | O7             | 3.2257   |                | O3                          | 3.1274   |               |
|                          |                |          |                | <b>Total average:2.6416</b> |          |               |
| <b>Nine-coordination</b> | <b>Ca5/Na3</b> |          | <b>Ca6/Na4</b> |                             |          |               |
|                          | O7             | 2.5029×3 |                | O1                          | 2.5904×3 |               |
|                          | O10            | 2.6584×3 | <b>2.7427</b>  | O8                          | 2.6707×3 | <b>2.6939</b> |
|                          | O2             | 2.8000×3 |                | O9                          | 2.8205×3 |               |
|                          |                |          |                | <b>Total average:2.7183</b> |          |               |

Table S5 The lattice, site occupation and isotropic displacement parameters of  $\text{Na}_2\text{Ca}_{7.98}\text{Al}_6\text{O}_{18}:0.02\text{Bi}^{3+}$

| Atom | Occup. | x       | y       | z       | Uiso   |
|------|--------|---------|---------|---------|--------|
| Ca1  | 0.500  | 0.0009  | 0.0021  | 0.5196  | 0.148  |
| Ca2  | 1.000  | 0.0008  | 0.0185  | 0.2382  | 0.0215 |
| Ca3  | 1.000  | 0.0119  | 0.2677  | 0.1325  | 0.0474 |
| Ca4  | 1.000  | 0.2625  | 0.2702  | 0.2523  | 0.0041 |
| Ca5  | 0.678  | 0.2610  | 0.2460  | 0.4989  | 0.0467 |
| Na1  | 0.322  | 0.2610  | 0.2460  | 0.4989  | 0.0014 |
| Ca6  | 0.500  | 0.5024  | 0.4979  | 0.4838  | 0.0025 |
| Ca7  | 1.000  | 0.4916  | 0.4833  | 0.2402  | 0.0057 |
| Ca8  | 1.000  | 0.5055  | 0.2329  | -0.1341 | 0.0145 |
| Ca9  | 1.000  | 0.7494  | 0.2297  | -0.2533 | 0.0149 |
| Ca10 | 0.322  | 0.7629  | 0.2524  | -0.4986 | 0.0027 |
| Na2  | 0.678  | 0.7629  | 0.2524  | -0.4986 | 0.0027 |
| Na3  | 0.500  | 0.001   | -0.0150 | -0.0099 | 0.0375 |
| Na4  | 0.500  | 0.5023  | 0.5184  | 0.0110  | 0.0245 |
| Al1  | 1.000  | -0.0027 | -0.2155 | 0.1164  | 0.0024 |
| Al2  | 1.000  | 0.2403  | -0.0041 | 0.1143  | 0.0467 |
| Al3  | 1.000  | 0.2395  | 0.0058  | -0.1074 | 0.0069 |
| Al4  | 1.000  | 0.4944  | 0.7137  | -0.1161 | 0.0103 |
| Al5  | 1.000  | 0.7351  | 0.5030  | -0.1113 | 0.0034 |

|      |       |         |         |         |        |
|------|-------|---------|---------|---------|--------|
| Al6  | 1.000 | 0.7442  | 0.4950  | 0.1099  | 0.0097 |
| O1   | 1.000 | -0.1380 | -0.1309 | 0.1070  | 0.0238 |
| O2   | 1.000 | 0.1172  | -0.1079 | 0.1287  | 0.0229 |
| O3   | 1.000 | 0.2864  | -0.0223 | 0.0026  | 0.0141 |
| O4   | 1.000 | -0.0150 | -0.2877 | 0.2174  | 0.0196 |
| O5   | 1.000 | 0.0235  | -0.2941 | 0.0174  | 0.0136 |
| O6   | 1.000 | 0.3611  | -0.0703 | 0.1727  | 0.0163 |
| O7   | 1.000 | 0.1849  | 0.1433  | 0.1367  | 0.0195 |
| O8   | 1.000 | 0.1617  | -0.1295 | -0.1379 | 0.0158 |
| O9   | 1.000 | 0.3680  | 0.0677  | -0.1604 | 0.0145 |
| O10  | 1.000 | 0.3522  | 0.6365  | -0.1118 | 0.0180 |
| O11  | 1.000 | 0.6053  | 0.5968  | -0.1242 | 0.0219 |
| O12  | 1.000 | 0.7853  | 0.5221  | -0.0013 | 0.0160 |
| O13  | 1.000 | 0.4990  | 0.7844  | -0.2184 | 0.0067 |
| O14  | 1.000 | 0.5142  | 0.7929  | -0.0173 | 0.0079 |
| O15  | 1.000 | 0.8508  | 0.5733  | -0.1727 | 0.0078 |
| O16  | 1.000 | 0.6888  | 0.3503  | -0.1297 | 0.0027 |
| O17  | 1.000 | 0.6638  | 0.6255  | 0.1450  | 0.0114 |
| O18  | 1.000 | 0.8760  | 0.4337  | 0.1591  | 0.0124 |
| Bi1  | 0.001 | 0.0009  | 0.0021  | 0.5196  | 0.0054 |
| Bi2  | 0.003 | 0.0008  | 0.0185  | 0.2382  | 0.0412 |
| Bi3  | 0.001 | 0.0119  | 0.2677  | 0.1325  | 0.0456 |
| Bi4  | 0.002 | 0.2625  | 0.2702  | 0.2523  | 0.0035 |
| Bi5  | 0.001 | 0.2610  | 0.2460  | 0.4989  | 0.0157 |
| Bi6  | 0.004 | 0.5024  | 0.4979  | 0.4838  | 0.0168 |
| Bi7  | 0.002 | 0.4916  | 0.4833  | 0.2402  | 0.0031 |
| Bi8  | 0.001 | 0.5055  | 0.2329  | -0.1341 | 0.0024 |
| Bi9  | 0.001 | 0.7494  | 0.2297  | -0.2533 | 0.0261 |
| Bi10 | 0.004 | 0.7629  | 0.2524  | -0.4986 | 0.0010 |

Table S6 The cation-oxygen bond lengths in the  $\text{Na}_2\text{Ca}_{7.98}\text{Al}_6\text{O}_{18} \cdot 0.02\text{Bi}^{3+}$

|                                | Atom       | Length   | Average       | Atom       | Length   | Average       |
|--------------------------------|------------|----------|---------------|------------|----------|---------------|
| <b>Six-<br/>coordination</b>   | <b>Ca3</b> |          |               | <b>Ca8</b> |          |               |
|                                | O7         | 2.3169   |               | O13        | 2.3019   |               |
|                                | O5         | 2.319    |               | O14        | 2.3184   |               |
|                                | O4         | 2.3502   | <b>2.3543</b> | O6         | 2.3583   | <b>2.3531</b> |
|                                | O15        | 2.3619   |               | O16        | 2.3671   |               |
|                                | O18        | 2.3651   |               | O9         | 2.3686   |               |
|                                | O8         | 2.4129   |               | O17        | 2.4042   |               |
| <b>Total average:2.3537</b>    |            |          |               |            |          |               |
| <b>Seven-<br/>coordination</b> | <b>Ca1</b> |          |               | <b>Ca6</b> |          |               |
|                                | O5         | 2.2842×2 |               | O14        | 2.2818×2 |               |
|                                | O12        | 2.3665×2 | <b>2.5631</b> | O3         | 2.3491×2 | <b>2.5701</b> |
|                                | O18        | 2.6056   |               | O9         | 2.7216   |               |

|                           |            |        |               |                             |        |               |
|---------------------------|------------|--------|---------------|-----------------------------|--------|---------------|
|                           | O15        | 2.9272 |               | O6                          | 2.8918 |               |
|                           | O18        | 3.1079 |               | O9                          | 3.1153 |               |
|                           | <b>Ca2</b> |        |               | <b>Ca7</b>                  |        |               |
|                           | O4         | 2.2136 |               | O6                          | 2.1551 |               |
|                           | O18        | 2.2492 |               | O13                         | 2.2503 |               |
|                           | O15        | 2.3395 |               | O9                          | 2.3312 |               |
|                           | O2         | 2.4964 | <b>2.5373</b> | O11                         | 2.4758 | <b>2.5401</b> |
|                           | O8         | 2.623  |               | O17                         | 2.5155 |               |
|                           | O7         | 2.8644 |               | O10                         | 2.9733 |               |
|                           | O1         | 2.9752 |               | O16                         | 3.0792 |               |
|                           |            |        |               | <b>Total average:2.5527</b> |        |               |
| <b>Eight-coordination</b> | <b>Ca4</b> |        |               | <b>Ca5/Na1</b>              |        |               |
|                           | O17        | 2.3506 |               | O1                          | 2.4787 |               |
|                           | O7         | 2.3813 |               | O12                         | 2.4821 |               |
|                           | O15        | 2.4198 |               | O14                         | 2.5131 |               |
|                           | O9         | 2.4816 | <b>2.6875</b> | O7                          | 2.5453 | <b>2.6553</b> |
|                           | O13        | 2.7100 |               | O17                         | 2.6689 |               |
|                           | O1         | 2.7424 |               | O11                         | 2.8868 |               |
|                           | O4         | 2.8022 |               | O3                          | 3.0122 |               |
|                           | O11        | 2.8126 |               | O5                          | 3.1347 |               |
|                           | <b>Ca9</b> |        |               | <b>Ca10/Na2</b>             |        |               |
|                           | O16        | 2.3764 |               | O5                          | 2.3945 |               |
|                           | O6         | 2.4343 |               | O16                         | 2.4144 |               |
|                           | O8         | 2.4458 |               | O10                         | 2.4376 |               |
|                           | O10        | 2.5324 | <b>2.6155</b> | O3                          | 2.5042 | <b>2.6460</b> |
|                           | O18        | 2.6076 |               | O8                          | 2.5659 |               |
|                           | O2         | 2.722  |               | O2                          | 2.8066 |               |
|                           | O13        | 2.7993 |               | O12                         | 2.9896 |               |
|                           | O4         | 3.0062 |               | O14                         | 3.0554 |               |
|                           |            |        |               | <b>Total average:2.6261</b> |        |               |



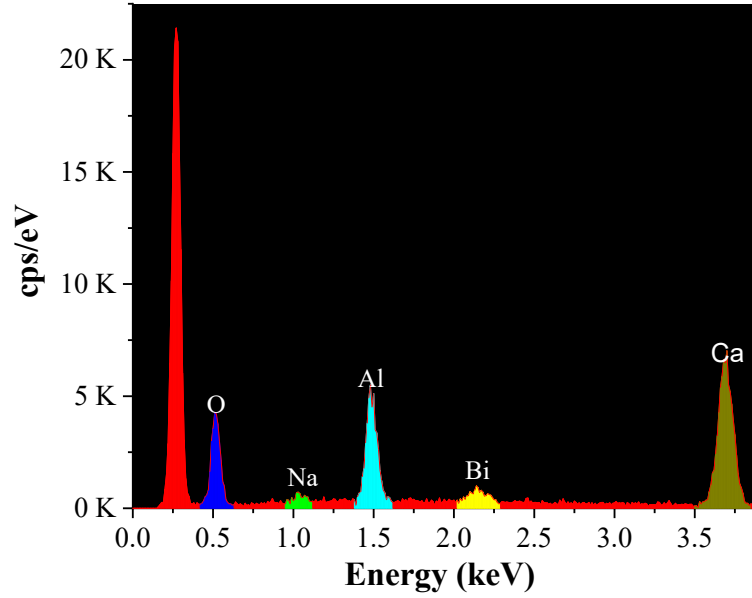

Figure S5 EDS analysis results of  $\text{Na}_{0.625}\text{Ca}_{8.668}\text{Al}_6\text{O}_{18}:0.02\text{Bi}^{3+}$ .

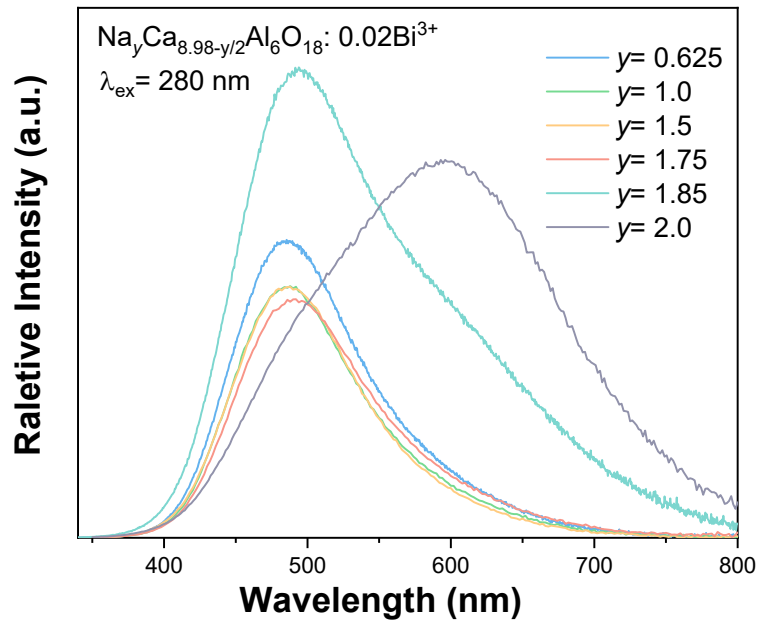

Figure S6 The PL emission spectra of  $\text{Na}_y\text{Ca}_{9-y/2}\text{Al}_6\text{O}_{18}:0.02\text{Bi}^{3+}$  ( $0.625 \leq y \leq 2$ ).

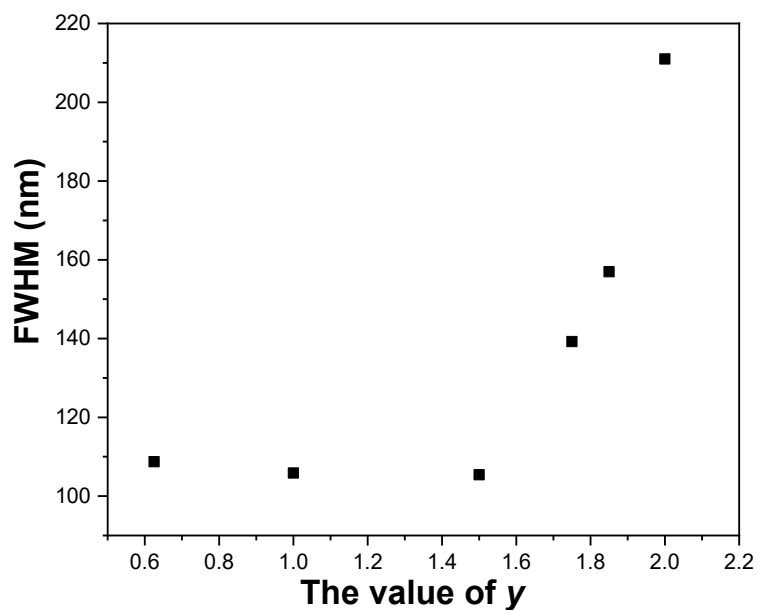

Figure S7 FWHM values of  $\text{Na}_y\text{Ca}_{8.98-y/2}\text{Al}_6\text{O}_{18}: 0.02\text{Bi}^{3+}$  ( $0.625 \leq y \leq 2$ ) upon 280 nm excitation.

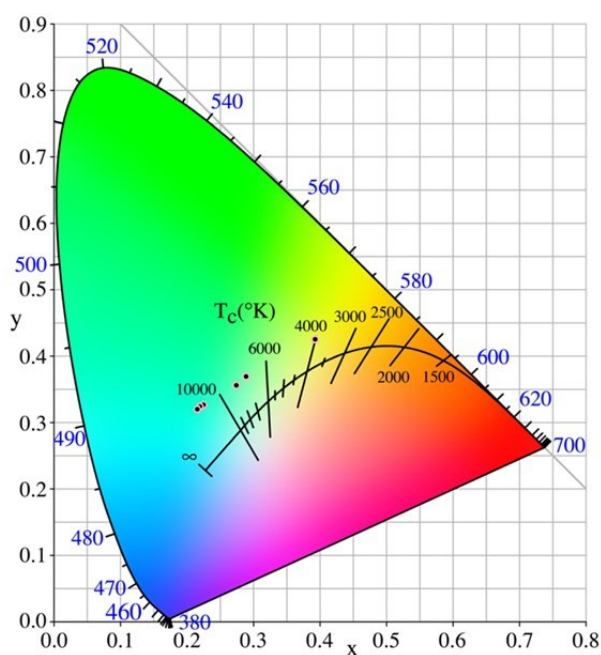

Figure S8 CIE coordinates of  $\text{Na}_y\text{Ca}_{8.98-y/2}\text{Al}_6\text{O}_{18}: 0.02\text{Bi}^{3+}$  ( $0.625 \leq y \leq 2$ ) upon 280 nm excitation.

Table S7 CIE coordinates of  $\text{Na}_y\text{Ca}_{8.98-y/2}\text{Al}_6\text{O}_{18}: 0.02\text{Bi}^{3+}$  ( $0.625 \leq y \leq 2$ ).

| y (Na) | CIE x  | CIE y  | CCT/K |
|--------|--------|--------|-------|
| 0.625  | 0.2258 | 0.3265 | 13220 |
| 1      | 0.2195 | 0.3236 | 14138 |
| 1.5    | 0.2101 | 0.3199 | 15632 |
| 1.75   | 0.2748 | 0.3564 | 8283  |
| 1.85   | 0.2893 | 0.3697 | 7351  |
| 2      | 0.3931 | 0.425  | 3986  |

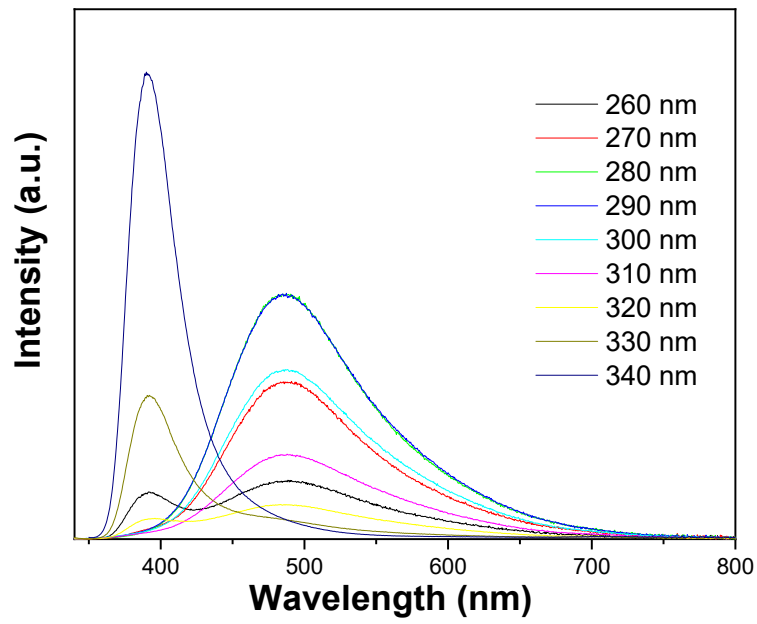

Figure S9 Emission spectra of  $\text{Na}_{0.625}\text{Ca}_{8.683}\text{Al}_6\text{O}_{18}: 0.005\text{Bi}^{3+}$  upon different wavelength excitation.

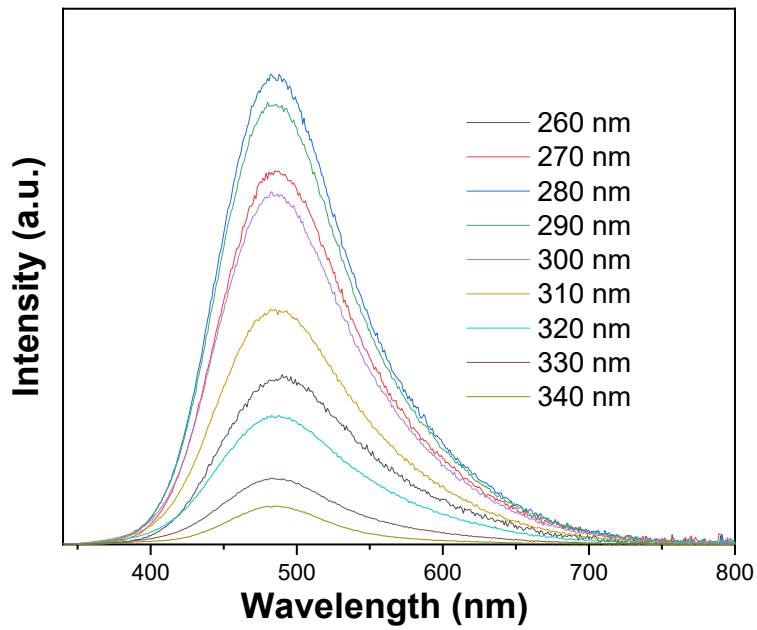

Figure S10 Emission spectra of  $\text{Na}_{0.625}\text{Ca}_{8.668}\text{Al}_6\text{O}_{18}: 0.02\text{Bi}^{3+}$  upon different wavelength excitation.

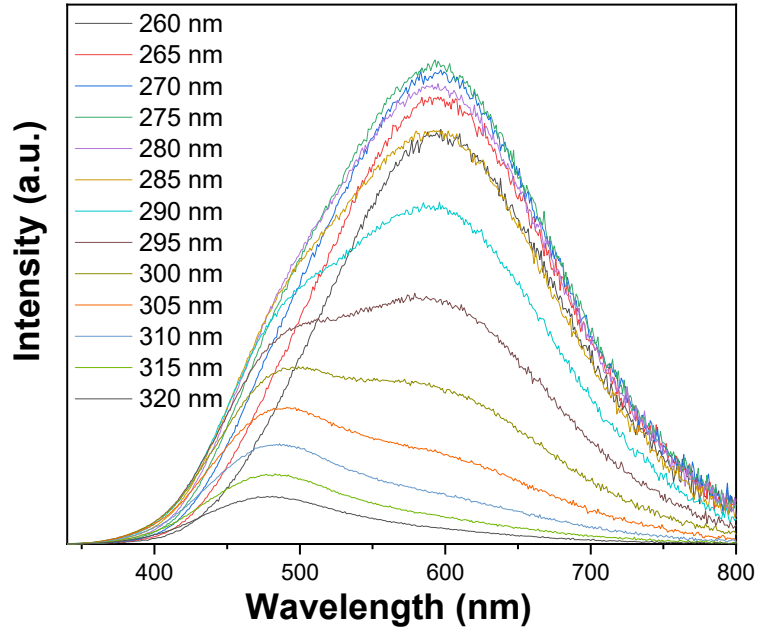

Figure S11 Emission spectra of  $\text{Na}_2\text{Ca}_{7.98}\text{Al}_6\text{O}_{18}:\text{0.02Bi}^{3+}$  upon different wavelength excitation.

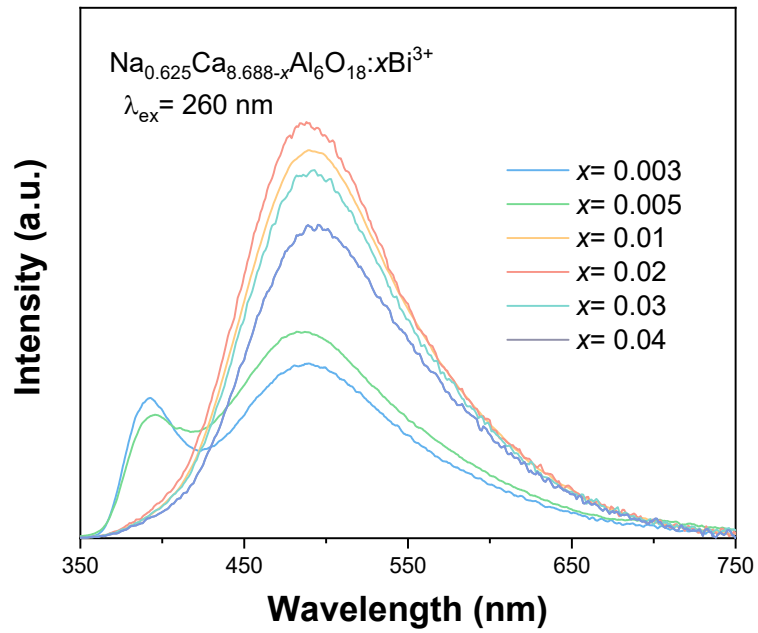

Figure S12 PL ( $\lambda_{\text{ex}} = 260 \text{ nm}$ ) spectra of  $\text{Na}_{0.625}\text{Ca}_{8.688-x}\text{Al}_6\text{O}_{18}:\text{xBi}^{3+}$  ( $0.003 \leq x \leq 0.04$ ) sample.

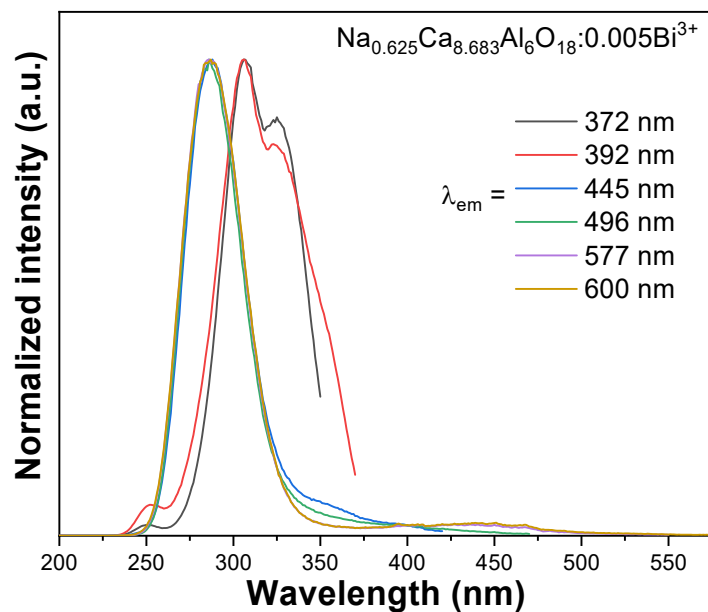

Figure S13 The excitation spectra of  $\text{Na}_{0.625}\text{Ca}_{8.683}\text{Al}_6\text{O}_{18}:0.005\text{Bi}^{3+}$  by monitored different wavelength emission.

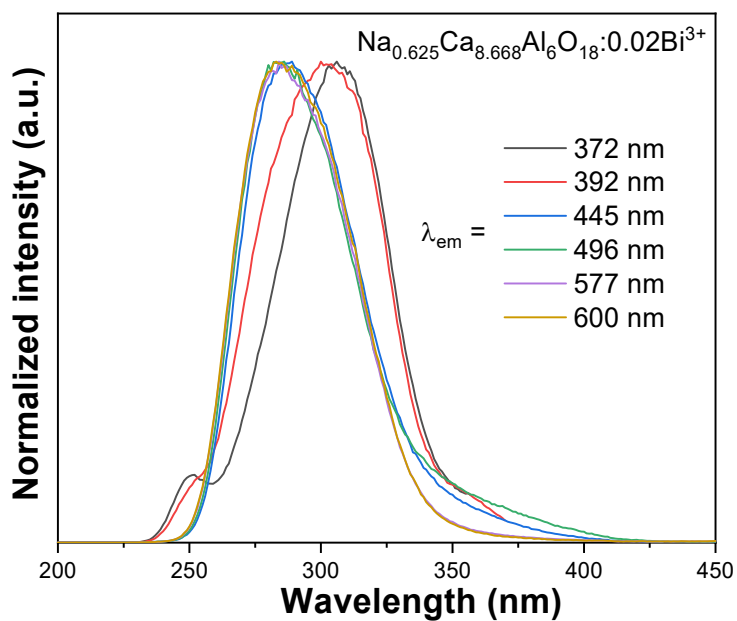

Figure S14 The excitation spectra of  $\text{Na}_{0.625}\text{Ca}_{8.668}\text{Al}_6\text{O}_{18}:0.02\text{Bi}^{3+}$  by monitored different

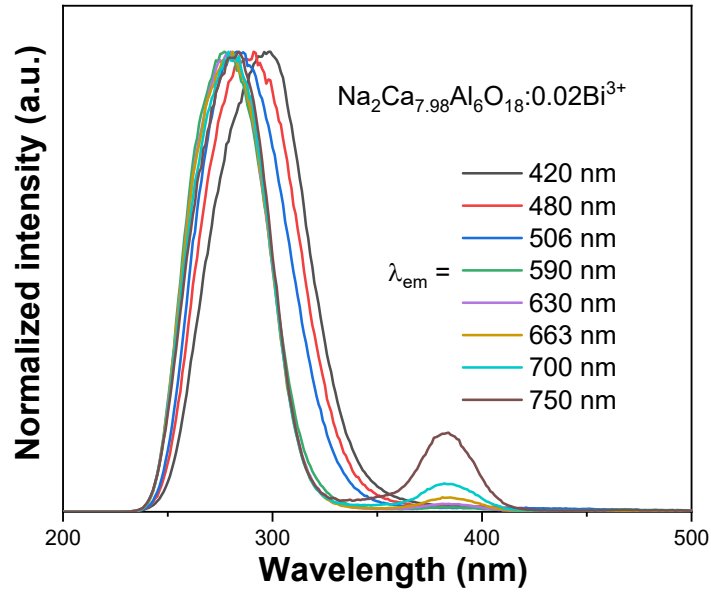

Figure S15 The excitation spectra of  $\text{Na}_2\text{Ca}_{7.98}\text{Al}_6\text{O}_{18}:0.02\text{Bi}^{3+}$  by monitored different wavelength emission.

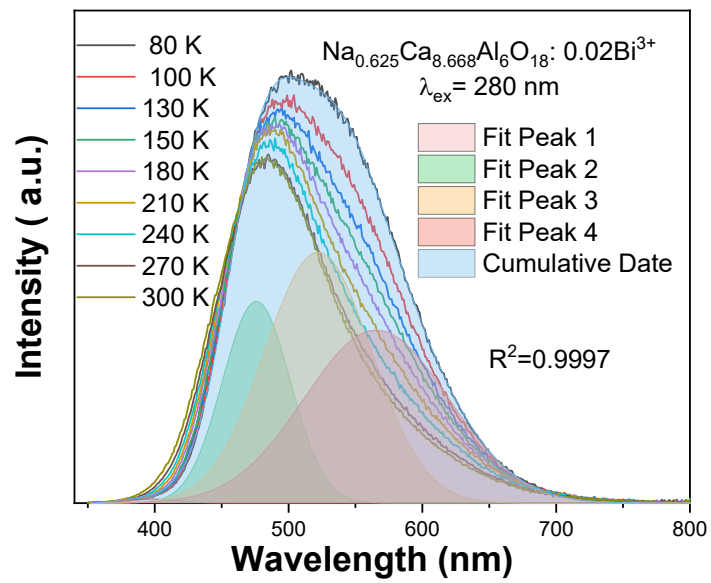

Figure S16 The temperature dependent emission spectra of  $\text{Na}_{0.625}\text{Ca}_{8.668}\text{Al}_6\text{O}_{18}:0.02\text{Bi}^{3+}$  ranging from 80 to 300 K;

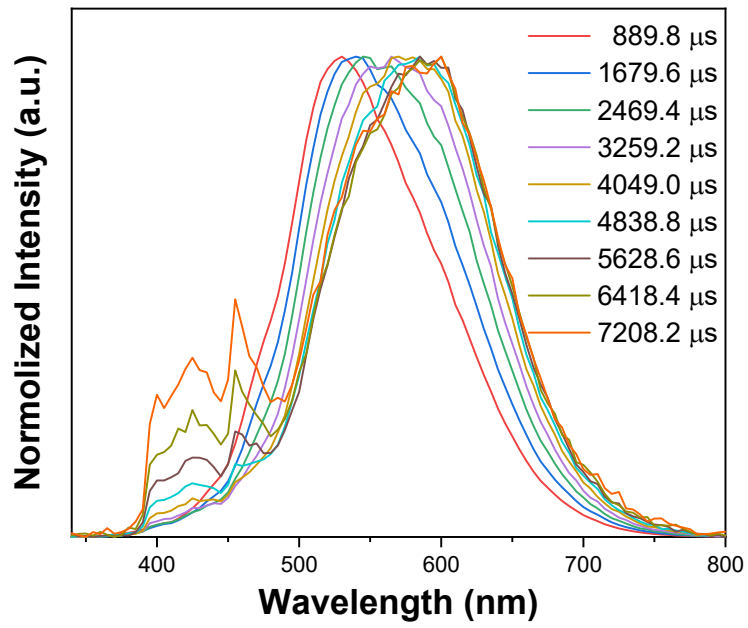

Figure S17 The normalized time-resolved photoluminescence (TRPL) spectra of  $\text{Na}_2\text{Ca}_{7.98}\text{Al}_6\text{O}_{18}:0.02\text{Bi}^{3+}$  at 10 K.

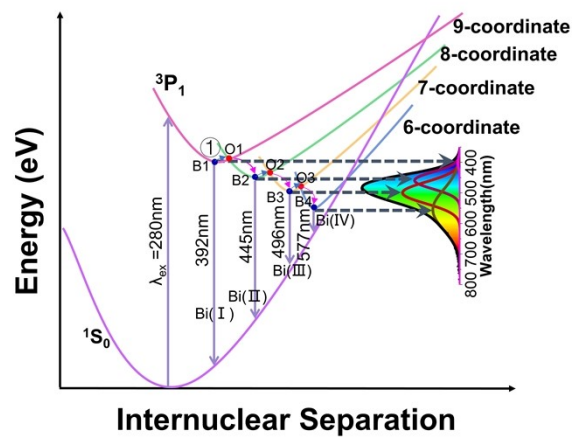

Figure S18 Configurational coordinate diagram of the ground state and four split excited states of  $\text{Na}_{0.625}\text{Ca}_{8.668}\text{Al}_6\text{O}_{18}:0.02\text{Bi}^{3+}$

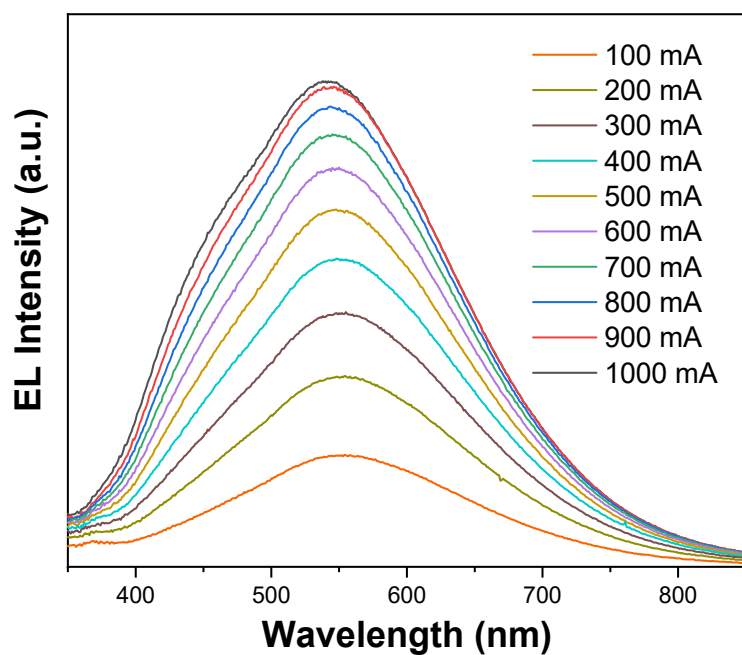

Figure S19 Electroluminescence spectra of the fabricated WLEDs driven by different currents.

Table S8 The CIE coordinates of the fabricated WLEDs driven by different currents.

| current (mA) | CIE $x$ | CIE $y$ | CCT/K |
|--------------|---------|---------|-------|
| 100          | 0.3574  | 0.4087  | 4802  |
| 200          | 0.3559  | 0.4061  | 4833  |
| 300          | 0.3533  | 0.4034  | 4900  |
| 400          | 0.3503  | 0.4009  | 4976  |
| 500          | 0.3468  | 0.3982  | 5073  |
| 600          | 0.3440  | 0.3957  | 5152  |
| 700          | 0.3412  | 0.3931  | 5236  |
| 800          | 0.3382  | 0.3902  | 5325  |
| 900          | 0.3354  | 0.3869  | 5415  |
| 1000         | 0.3306  | 0.3809  | 5577  |

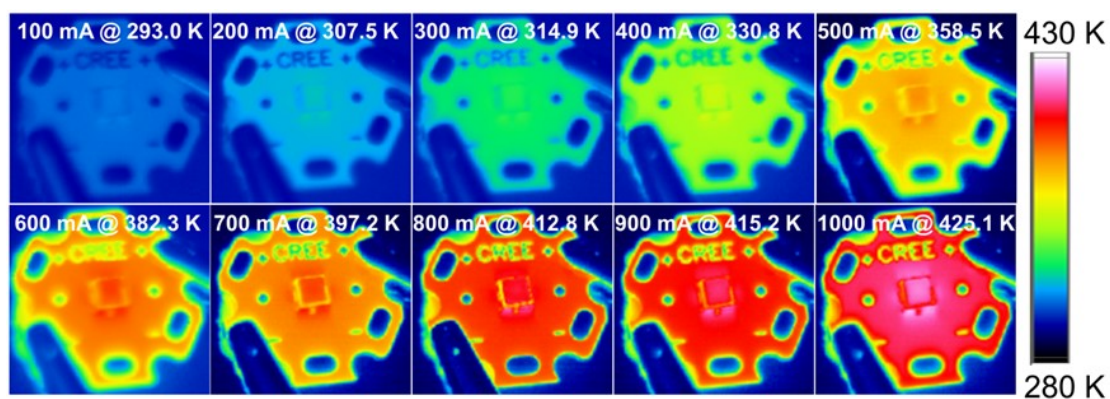

Figure S20 Thermal imaging of the WLED driven at different currents



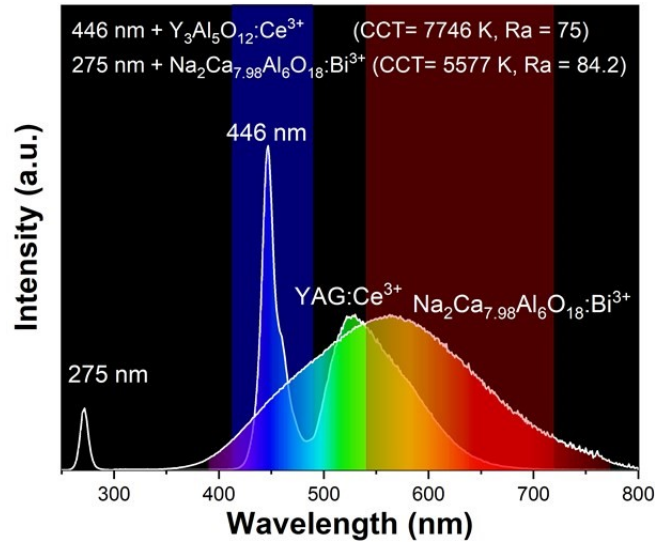

Figure S21 The spectra of 446 nm chip with YAG:Ce<sup>3+</sup> and 275 nm chip with Na<sub>2</sub>Ca<sub>7.98</sub>Al<sub>6</sub>O<sub>18</sub>:0.02Bi<sup>3+</sup>

Table S9 Comparison of performance parameters of fabricated pc-WLED with other tunable broadband emitting phosphors.

| Samples                                                                                  | $\lambda_{ex}$ (nm) | $\lambda_{em}$ (nm) | FWHM(nm) | CCT (K) | CIE           | R <sub>a</sub> | Ref.      |
|------------------------------------------------------------------------------------------|---------------------|---------------------|----------|---------|---------------|----------------|-----------|
| Sr <sub>3</sub> Ga <sub>4</sub> O <sub>9</sub> :Bi <sup>3+</sup>                         | 330                 | 530                 | ~200     | 5896    | (0.320,0.466) | 79             | S1        |
| Ca <sub>3</sub> Ga <sub>4</sub> O <sub>9</sub> :Bi <sup>3+</sup>                         | 370                 | 510                 | ~120     | 8085    | (0.250,0.420) | 50.5           | S2        |
| Ba <sub>3</sub> Y <sub>4</sub> O <sub>9</sub> :Bi <sup>3+</sup>                          | 350                 | 610                 | ~150     | 3720    | (0.476,0.445) | 95             | S3        |
| Ba <sub>3</sub> Y <sub>2</sub> Lu <sub>2</sub> O <sub>9</sub> :Bi <sup>3+</sup>          | 350                 | 580                 | ~180     | 4808    | (0.447,0.479) | 94             | S3        |
| Ba <sub>2</sub> ZnGe <sub>2</sub> O <sub>7</sub> :Bi <sup>3+</sup>                       | 395                 | 500, 620            | -        | 3942    | (0.369,0.311) | 84.6           | S4        |
| Ba <sub>2</sub> MgGe <sub>2</sub> O <sub>7</sub> :Bi <sup>3+</sup>                       | 395                 | 500, 620            | -        | 4466    | (0.343,0.301) | 98.9           | S4        |
| Na <sub>2</sub> Ca <sub>3</sub> Nb <sub>2</sub> O <sub>9</sub> :Bi <sup>3+</sup>         | 365                 | 600                 | ~150     | 3748    | (0.410,0.420) | 88.6           | S5        |
| CSMKPO:0.02Eu <sup>2+</sup>                                                              | 330                 | 490                 | ~175     | 5186    | (0.340,0.346) | 89             | S6        |
| YTaO <sub>4</sub> :0.03Bi <sup>3+</sup>                                                  | 365                 | 500                 | ~225     | 9449    | (0.274,0.323) | 77.8           | S7        |
| GAGO:0.06Ce <sup>3+</sup>                                                                | 460                 | 575                 | ~150     | 3778    | (0.390,0.380) | 73             | S8        |
| Ba <sub>2</sub> Y(SiO <sub>4</sub> ) <sub>3</sub> F:Eu                                   | 350                 | 600                 | ~200 nm  | 3530    | (0.402,0.371) | 83.5           | S9        |
| Ca <sub>9.75</sub> Mg <sub>0.75</sub> (PO <sub>4</sub> ) <sub>7</sub> :Eu <sup>2+</sup>  | 365                 | 575                 | -        | 3788    | (0.385,0.365) | 85             | S10       |
| NaLi <sub>3</sub> Si <sub>0.75</sub> O <sub>4</sub> :Eu <sup>2+</sup>                    | 365                 | 585                 | -        | 6599    | (0.312,0.322) | 82.9           | S11       |
| BaSrMg(PO <sub>4</sub> ) <sub>2</sub> :Eu <sup>2+</sup>                                  | 385                 | 460, 550            | -        | 5892    | (0.320,0.330) | 84             | S12       |
| Na <sub>2</sub> Ca <sub>7.98</sub> Al <sub>6</sub> O <sub>18</sub> :0.02Bi <sup>3+</sup> | 280                 | 590                 | 228 nm   | 5577    | (0.331,0.381) | 84.2           | This work |

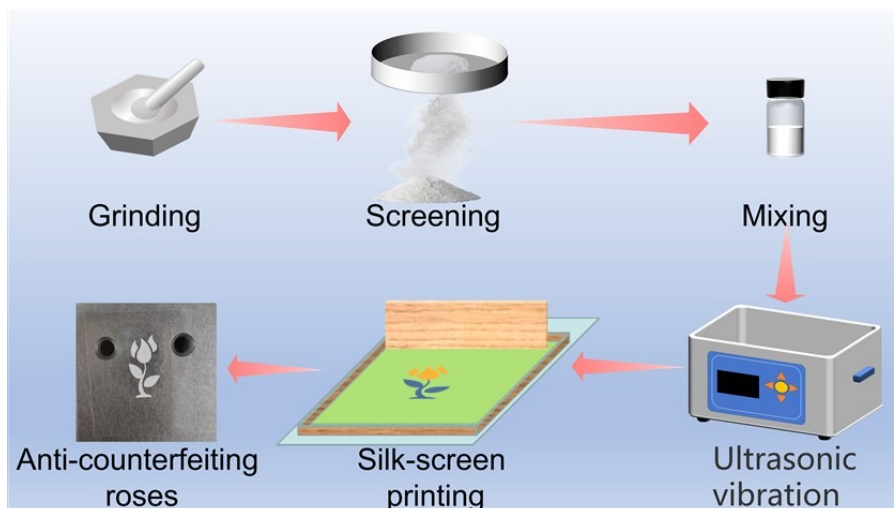

Figure S22 The synthesis process of the fabricated anti-counterfeiting rose label

## References

- S1. X. Zhu, T. Wang, H. Liu, L. Nie, F. Zhao, S. Yu, J. Qiu, X. Xu and X. Yu, *Materials Today Physics*, 2023, **31**, 100968.
- S2. D. Liu, X. Yun, G. Li, P. Dang, M. S. Molokeev, H. Lian, M. Shang and J. Lin, *Advanced Optical Materials*, 2020, **8**, 2001037.
- S3. G. Xing, Z. Gao, M. Tao, Y. Wei, Y. Liu, P. Dang, G. Li and J. Lin, *Inorganic Chemistry Frontiers*, 2019, **6**, 3598-3603.
- S4. Y. Wei, H. Yang, Z. Gao, X. Yun, G. Xing, C. Zhou and G. Li, *Laser & Photonics Reviews*, 2021, **15**, 2000048.
- S5. H. Zhang, J. Zhang, Y. Su and X. Zhang, *Advanced Optical Materials*, 2022, **10**, 2200150.
- S6. J. Qiao, Z. Zhang, J. Zhao and Z. Xia, *Inorganic chemistry*, 2019, **58**, 5006-5012.
- S7. Y. Fu, X. Wang and M. Peng, *Journal of Materials Chemistry C*, 2020, **8**, 6079-6085.
- S8. N. K. Mishra, A. Kumar and K. Kumar, *Journal of Alloys and Compounds*, 2023, **947**, 169440.
- S9. J. Wang, H. Lin, Q. Huang, G. Xiao, J. Xu, B. Wang, T. Hu and Y. Wang, *Journal of Materials Chemistry C*, 2017, **5**, 1789-1797.
- S10. Z. Leng, R. Li, L. Li, D. Xue, D. Zhang, G. Li, X. Chen and Y. Zhang, *ACS Applied Materials & Interfaces*, 2018, **10**, 33322-33334.
- S11. M. Zhao, Z. Yang, L. Ning and Z. Xia, *Advanced Materials*, 2021, **33**, 2101428.
- S12. Z. Wu, J. Liu, W. Hou, J. Xu and M. Gong, *Journal of Alloys and Compounds*, 2010, **498**, 139-142.
